# Supplementary material for: Islet α-, β-, and δ-Cell Development Is Controlled by the Ldb1 Coregulator, Acting Primarily With the Islet-1 Transcription Factor
Source: PubMed Central journal article supplement — Diabetes. 2013 Feb 14;62(3):875–86. doi: 10.2337/db12-0952 (PMC3581213; doi:10.2337/db12-0952), 2013-02-14

SUPPLEMENTARY DATA

**Supplementary Table 1.** PCR primer sequences used in mRNA expression analysis.

| Target          | 5' Sequence (5' to 3')    | 3' Sequence (5' to 3')   |
|-----------------|---------------------------|--------------------------|
| <i>Insulin</i>  | CCACCCAGGCTTTTGTCAA       | CCCAGCTCCAGTTGTTCCAC     |
| <i>Glucagon</i> | CATTCACCAGCGACTACAGCAA    | TCATCAACCACTGCACAAAATCT  |
| <i>Sst</i>      | AACGCAAAGCTGGCTGCAAGAA    | TCAGAGGTCTGGCTAGGACAACAA |
| <i>PP</i>       | TTGCAGCCTCTCTTGTCTTCA     | TAGTTTGCAAGGGAGCAGGTT    |
| <i>Ghrelin</i>  | AGCCCAGCAGAGAAAGGAATC     | GGGAGCATTGAACCTGATCTC    |
| <i>Pdx1</i>     | CGGCTGAGCAAGCTAAGGTT      | TGGAAGAAGCGCTCTCTTTGA    |
| <i>FoxA2</i>    | GAGCACCATTACGCCTTCAAC     | AGGCCTTGAGGTCCATTTTGT    |
| <i>Hb9</i>      | AACAAGTACCTGTCTCGACCC     | GCTGCGTTTCCATTTTATTTCG   |
| <i>Ngn3</i>     | TGACCCTATCCACTGCTGCTT     | CCTCATCCACCCTTTGGAGTT    |
| <i>Pax6</i>     | TGGCAAACAACCTGCCTATG      | TGCACGAGTATGAGGAGGTCT    |
| <i>Isl1</i>     | GCAACCCAACGACAAAATAA      | CCATCATGTCTCTCCGGACT     |
| <i>MafA</i>     | CCTGTAGAGGAAGCCGAGGAA     | CCTCCCCAGTCGAGTATAGC     |
| <i>NeuroD1</i>  | ACAGACGCTCTGCAAAGGTTTG    | GCGGATGGTTCGTGTTTGAAG    |
| <i>Nkx6.1</i>   | CCTCTGGACCCGAACCTCTGA     | GCTGCCACCGCTCGATT        |
| <i>Arx</i>      | TCCGGATACCCACTTAGCTT      | GACGCCCTTTCCTTTAAGTG     |
| <i>MafB</i>     | AACGCGTCCAGCAGAAACA       | AGCTGCTCCACCTGCTGAAT     |
| <i>Kras</i>     | TGAAGATGTGCCTATGGTCCTGGT  | ACCCTGTCTTGTCTTTGCTGAGGT |
| <i>Ube4B</i>    | AGCCACCAGCGAGTTCTATGACAA  | TGAACTCCTCCATGAAGGTGCCAT |
| <i>Fzd3</i>     | ACGGATCATTCCAGGCACAGTAGT  | AAGCACTGGTTCCATCCTCCTCAA |
| <i>Rnf6</i>     | AGAGAGCATAGGCAGCAAAGACCA  | TGCAAATGACCCTTGACAGAAACC |
| <i>Glp1r</i>    | TTGCCATTCTCTTTGCTATCGGC   | GGCAAGCCTGCATTTGATGTCAGT |
| <i>G6pc2</i>    | AGATGATATGGGTAGCGGTCA     | TGGGCCTGTTTCGCACGTAG     |
| <i>Kcnj11</i>   | TGTGCAGAAATATCGTCGGGCTGAT | GCATGCTTGCTGAAGATGAGGGTT |
| <i>ATP1a1</i>   | CCCAAATGCATCTGAGCCCAAACA  | AAGCGTCCTCAGCTCTTCATCCA  |
| <i>Ptprs</i>    | CGCCTTTAACATGCTCAGTGGCAA  | TCCGAAGTGGGACCATCACAATGA |
| <i>Slc2A2</i>   | CAGTTCGGCTATGACATCGGT     | GTTAATGGCAGCTTTCCGGTC    |

SUPPLEMENTARY DATA

|               |                        |                        |
|---------------|------------------------|------------------------|
| <i>Gapdh</i>  | AAC TTTGGCATTGTGGAAGG  | GGATGCAGGGATGATGTTCT   |
| <i>TBP</i>    | CCCCTTGTACCCTTCACCAAT  | GAAGCTGCGGTACAATTCCAG  |
| <i>Ldb1</i>   | ACTCATGTGGATGCCTGTGTG  | CCCCAACATTTAGCCCCTAAG  |
| <i>Ldb2</i>   | GGACGAGGACGAAAGGCTAAT  | ACAGCGTAATCAGGTGCCAGT  |
| <i>Lhx1</i>   | GACCTACCCTTTGTGCCATCA  | CCACCATTGACCGACAGAGAT  |
| <i>Lhx2</i>   | CAGCCCTTCACAAACGACTCT  | CAGGCGAGATCCTAAAACGTG  |
| <i>Lhx3</i>   | CTTCCTGGCCACTGACAAAAC  | TCTCGCATTTAGAGGCTACGC  |
| <i>Lhx4</i>   | CTTAGAGGCTTTGGCTGCTCA  | CTGGTGAGAGGGATGATTTGG  |
| <i>Lhx5</i>   | GGTCGAGATTCCAAGCACATC  | TTCTCTCCCCCTTCAACCTC   |
| <i>Lhx6</i>   | CTTCAGTGAGCACATGCCAAG  | GTGCATCAGGACACCAAGTCA  |
| <i>Lhx7/8</i> | TCTCGCTGCCAGGTATGTAT   | ACGATCAGTCCTGCCTTTCAG  |
| <i>Lhx9</i>   | GAAGTGCTGGGACAAAACCAC  | AGACCTTGGATCTCCGTGACA  |
| <i>Lmo1</i>   | CTATGAGGAGGGGCATCTCAA  | AGAACAGCCACCTTCCCATC   |
| <i>Lmo2</i>   | TGGA CTCTTCCTGGGCACTAA | GAAGCCTATCAGGATGGCACA  |
| <i>Lmo3</i>   | GCCTTTGGGTAGCATGTGAAC  | GGCCATCAGCTCATTAAACCAC |
| <i>Lmo4</i>   | CACCTTTGTAGCCAGCACCAT  | ATCTCCCATTAGCCCAGGTTT  |
| <i>Lmx1a</i>  | TCATAGAAGCAGAGGGGACCA  | GCACCGTAATTGGAGATCAGG  |
| <i>Lmx1b</i>  | GAACGACTCCATCTTCCACGA  | TGGCTCTCAGGAGGCAAAGTA  |

SUPPLEMENTARY DATA

**Supplementary Table 2.** PCR primer sequences used for ChIP analyses.

|                             |                          |                           |
|-----------------------------|--------------------------|---------------------------|
| <i>MafA</i><br>Region 3     | CTGGAAGATCACCGCACA       | ATTTACCAAGCCCCAAACG       |
| <i>Slc2A2</i> -<br>proximal | ATCTGGCTCCGCACTCTCATCTTG | CCCTGTGACTTTTCTGTGTCTTAGG |
| <i>Slc2A2</i> Re1           | CATGATCTTCGCTCCCGTAT     | CTCTGCAGGGCATCTTTCTC      |
| <i>Slc2A2</i> Re2           | CTTGTTCCCAAGTGACACCA     | CTAACAGCAGGGAGCACACA      |
| <i>Arx</i> Re1              | CCATTTGAAGGCAAAATGCT     | GTATGGGCTGCAAACACCTT      |
| <i>Arx</i> Re2              | TGAAGTGGCTGAATGAGAGC     | AGTTGGAGCGCGTTTTGTAG      |
| <i>Gpl1r</i>                | TTTAACTTCCCTGCTAGCCCACCA | AATCCTGCAGAGTGAGCTGCTGAT  |
| <i>Pepck</i>                | CAACAGGCAGGGTCAAAGTTTAG  | AGGCCTCAGGCCCTCTAT        |

SUPPLEMENTARY DATA

**Supplementary Table 3.** Antibodies, dilutions and conditions used for immunostaining experiments.

| Antibody target            | Dilution        | Embedding Media | Antigen                 |                                          |
|----------------------------|-----------------|-----------------|-------------------------|------------------------------------------|
|                            |                 |                 | Retrieval/Amplification | Source                                   |
| Ldb1                       | 1:3000          | OCT             |                         | P. Love –<br>NIH/NICHD                   |
| Lmo4                       | 1:300           | Paraffin        | CitraPlus boil          | J. Visvader                              |
| Insulin                    | 1:1000          | OCT, Paraffin   |                         | Invitrogen<br>#180067                    |
| Glucagon                   | 1:2000-<br>4000 | OCT, Paraffin   |                         | Sigma G2654                              |
| Somatostatin               | 1:1500          | OCT, Paraffin   |                         | American<br>Research Products<br>13-2366 |
| PP                         | 1:1500          | Paraffin        |                         | Linco RPP63-4                            |
| Ghrelin                    | 1:100           | OCT, Paraffin   |                         | Santa Cruz<br>sc-10368                   |
| Pdx1                       | 1:20000         | OCT, Paraffin   | TEG boil                | C. Wright -<br>Vanderbilt                |
| Dolichos biflorus<br>(DBA) | 1:1000          | Paraffin        |                         | Vector<br>Laboratories                   |
| Cytokeratin-19             | 1:50            | Paraffin        |                         | DSHB Troma III                           |
| Cre                        | 1:2000          | Paraffin        | TEG/Citraplus boil      | Novagen #69050                           |
| Amylase                    | 1:1000          | OCT, Paraffin   |                         | Sigma #A8273                             |
| Arx                        | 1:1000          | OCT             |                         | P. Collombat -<br>INSERM                 |
| MafA                       | 1:1000          | Paraffin        | TEG boil/TSA Amp.       | Bethyl BL-1069                           |

SUPPLEMENTARY DATA

|       |       |          |          |                             |
|-------|-------|----------|----------|-----------------------------|
| Glut2 | 1:100 | Paraffin | TEG boil | Alpha Diagnostic<br>#GT21-A |
| Glp1r | 1:300 | Paraffin |          | Abcam AB39072               |
| Pax6  | 1:300 | Paraffin | TEG boil | Covance PRB-<br>278P        |

SUPPLEMENTARY DATA

**Supplementary Figure 1.** *Ldb1* is removed from pancreatic endocrine cells of *Pax6-Cre;Ldb1<sup>F/F</sup>* mice by E15.5. A) Immunofluorescence staining of E14 *Pax6-Cre;Ldb1<sup>F/+</sup>* tissue demonstrating nuclear Cre expression (red) marking both *Pdx1<sup>+</sup>* (blue) and glucagon<sup>+</sup> (green) cells. B) *Ldb1* (red) localizes to the nuclei of insulin<sup>+</sup> and glucagon<sup>+</sup> cells (green) of control E15.5 *Ldb1<sup>F/+</sup>* pancreata (top), with levels greatly reduced or absent in the *Pax6-Cre;Ldb1<sup>F/F</sup>* mutant (bottom). The yellow dashed lines encircle hormone<sup>+</sup> clusters. Notably, *Ldb1* is not removed from non-hormone<sup>+</sup> cells, as expected from the endocrine cell specific expression pattern of the *Pax6-Cre* transgene (37, data not shown. C) Insulin, glucagon, and *Ldb1* co-positive cells were quantified in littermate control (*Ldb1<sup>F/F</sup>* and *Ldb1<sup>F/+</sup>*, blue bar) and *Ldb1* mutant E15.5 pancreata (red bar). D) *Ldb1* (red) is essentially absent from all *Pax6-Cre;Ldb1<sup>F/F</sup>* (bottom) insulin<sup>+</sup> (green) cells at E18.5, compared with *Ldb1<sup>F/+</sup>* littermate control pancreata (top). The yellow dashed lines encircle insulin<sup>+</sup> clusters in *Ldb1* mutant pancreata, with the arrows depicting the presence (white) or absence (yellow) of *Ldb1* in the control and *Ldb1* mutant, respectively.

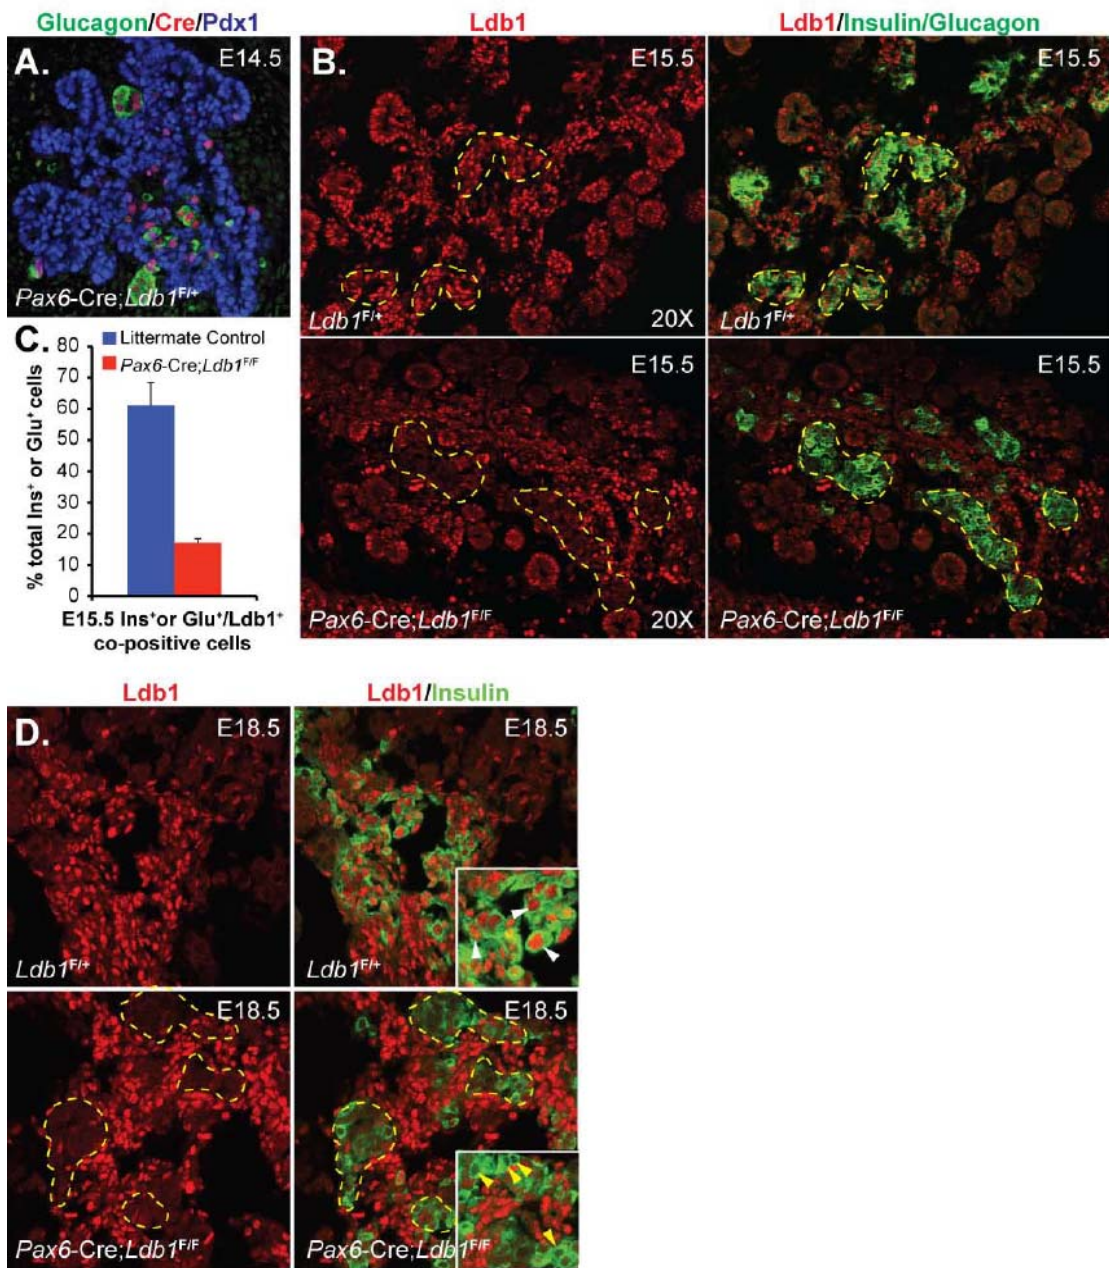

## SUPPLEMENTARY DATA

**Supplementary Figure 2.** Ldb2 loss does not impact pancreatic islet development. Analysis of insulin (green), glucagon (red) and amylase (blue) expression at E18.5 in *Ldb1*<sup>F/+</sup> control (left), *Ldb2* mutant (*Ldb1*<sup>F/F</sup>;*Ldb2*<sup>-/-</sup>, center) and *Ldb1*/*Ldb2* double mutant (*Pax6-Cre*;*Ldb1*<sup>F/F</sup>;*Ldb2*<sup>-/-</sup>, right) pancreata. Islet endocrine cells were lost upon deletion of *Ldb1* (right) and not *Ldb2* (center).

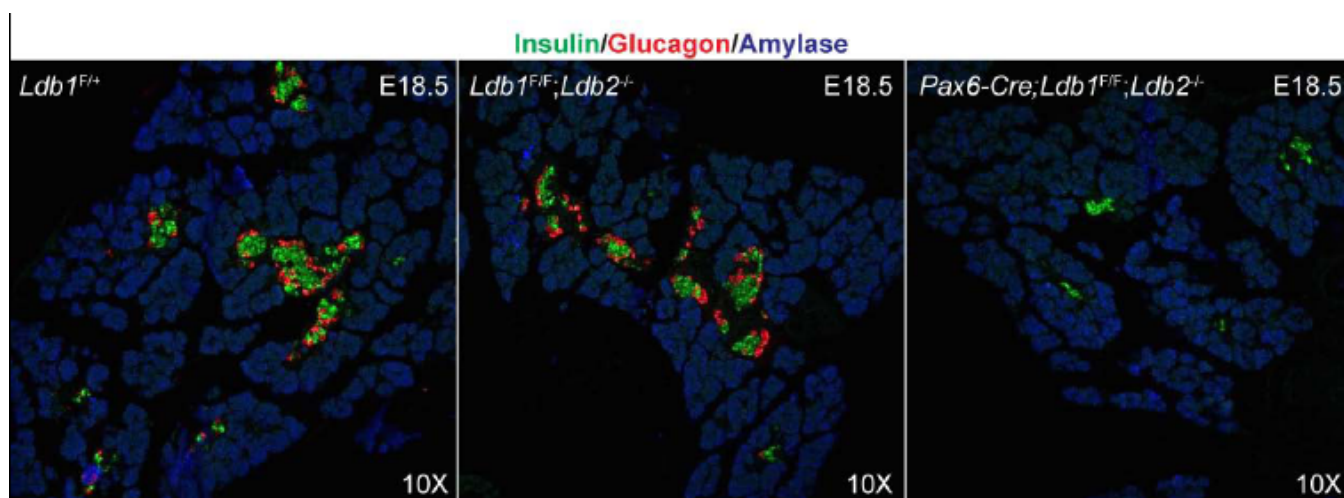

Supplement: supp_db12-0952_DB120952SupplementaryData.pdf [file supp_db12-0952_DB120952SupplementaryData.pdf]
